# Supplementary material
Source: publisher figshare collection journal article supplement (https://acs.figshare.com/ndownloader/files/16237475)
Supplement: Supplementary file 1 [file 16237475]

## **Supporting Information**

### **Single-Crystal NMR Characterization of Halogen Bonds**

Yijue Xu, Bulat Gabidullin, and David L. Bryce\*

\*Author to whom correspondence is to be addressed

Department of Chemistry and Biomolecular Sciences

University of Ottawa

10 Marie Curie Private

Ottawa, Ontario K1N 6N5

Canada

Tel: +1-613-562-5800 ext.2018; fax: +613-562-5170

Email: [dbryce@uottawa.ca](mailto:dbryce@uottawa.ca)

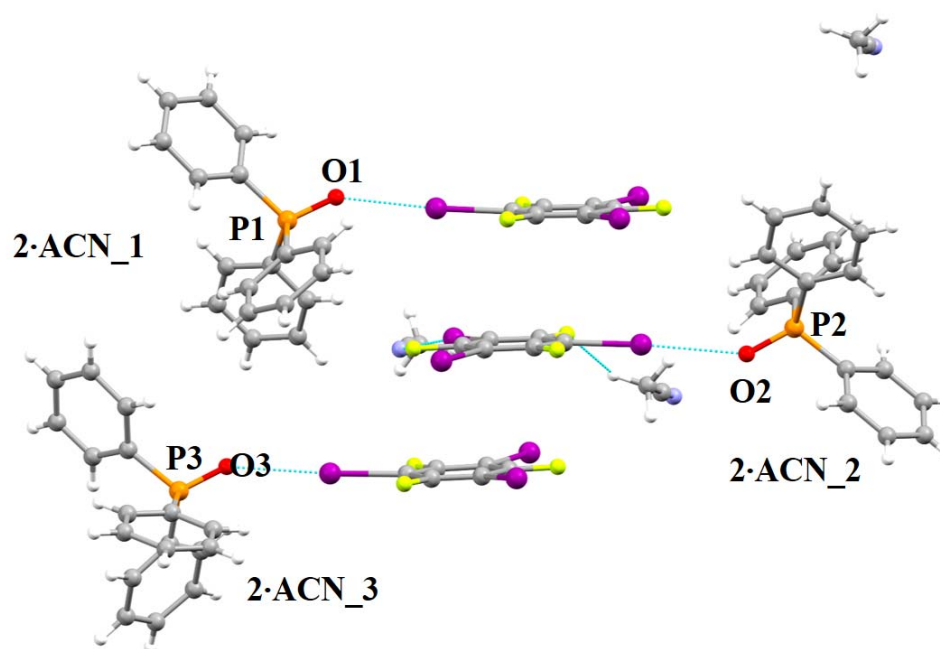

**Figure S1.** Halogen bond geometry in one unit cell of cocrystal **2·ACN** from single-crystal X-ray diffraction. The three crystallographically distinct sites are shown with labels consistent with the main text. Molecules **2·ACN** \_1 and \_3 share similar environments and orientation whereas **2·ACN** \_2 faces in the opposite direction.

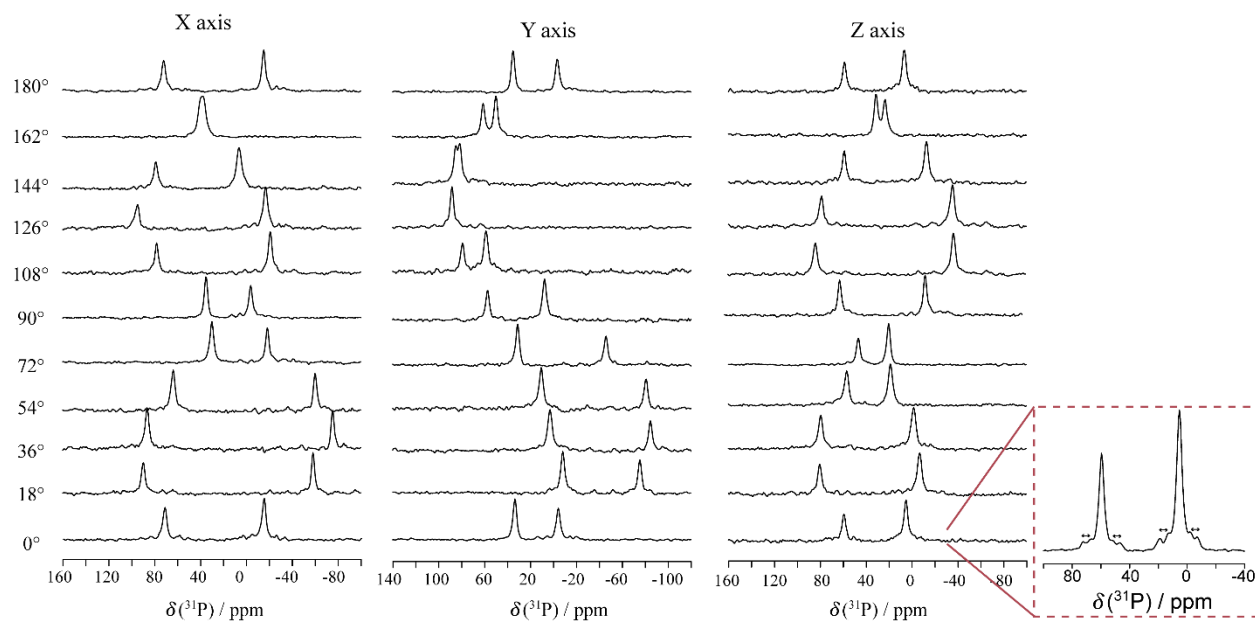

**Figure S2.** Single-crystal  $^{31}\text{P}$  NMR spectra ( $B_0 = 9.4$  T) for  $\text{Ph}_3\text{P}^{17}\text{O}$ . Spectra were obtained at  $9^\circ$  rotational increments about the X, Y, and Z axes. Here only every second spectrum is shown. Shown in the inset is a magnification of the spectra to show the presence of spin-spin coupling between  $^{17}\text{O}$  and  $^{31}\text{P}$ .

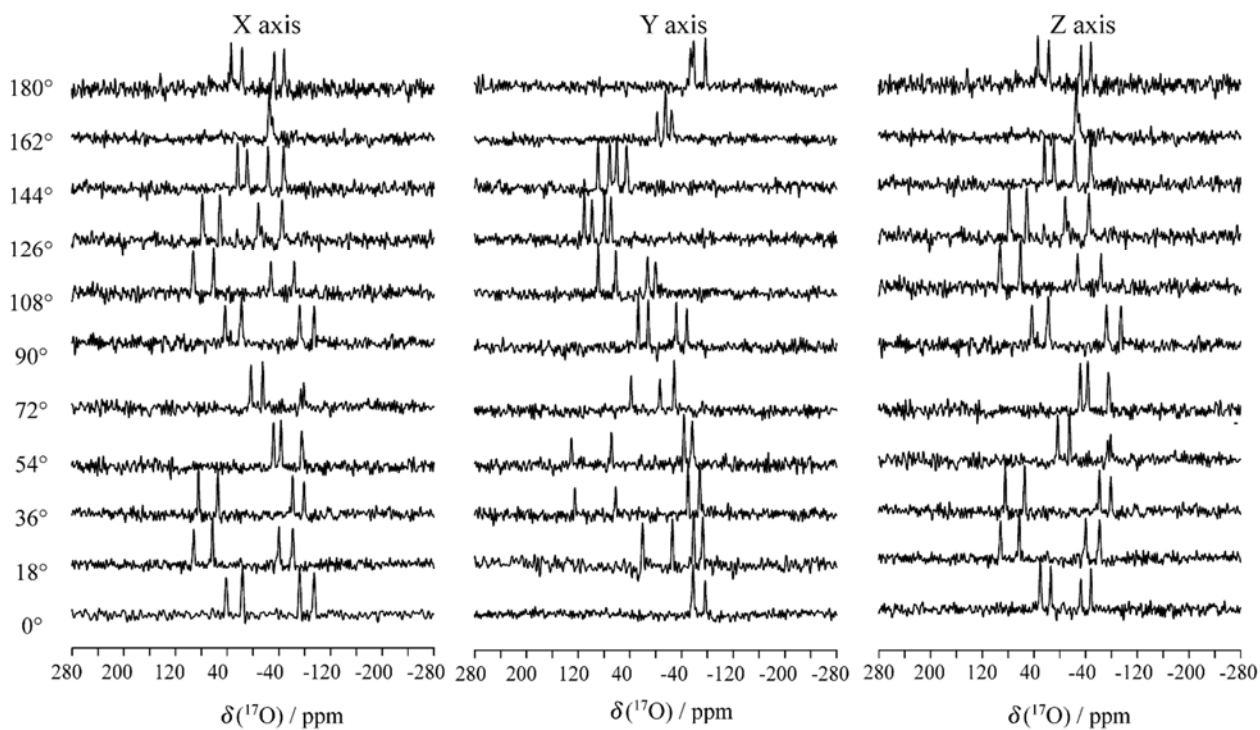

**Figure S3.** Single-crystal  $^{17}\text{O}$  NMR spectra ( $B_0 = 9.4$  T) for monoclinic  $\text{Ph}_3\text{P}^{17}\text{O}$ . Spectra were obtained at  $9^\circ$  rotational increments about the X, Y, and Z axes. Here only every second spectrum is shown.

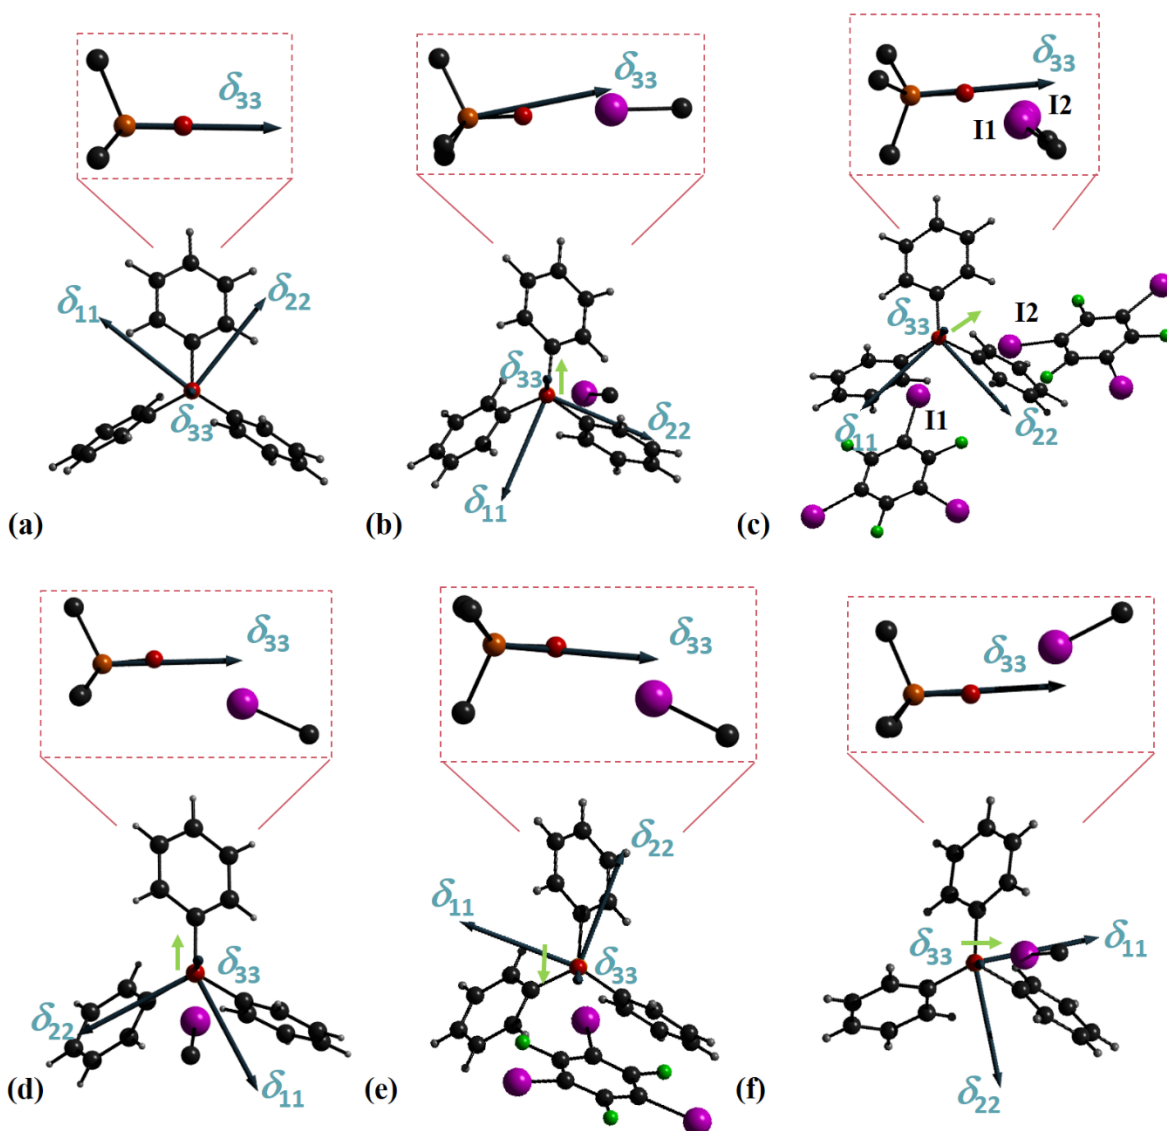

**Figure S4.** Depictions of the crystal structure of the starting material  $\text{Ph}_3\text{P}^{17}\text{O}$  (a), and its halogen-bonded cocrystals: **1** (b), **2** (c) and **2·ACN\_1** (d), **2·ACN\_2** (e) and **2·ACN\_3** (f) where the  $\text{P}=\text{O}$  bond is perpendicular to the plane for illustration of the orientation of  $^{31}\text{P}$  CS tensors (indicated by dark green arrows) in the molecular frame. The light green arrows indicate the direction of  $\delta_{33}$  movement upon halogen bond formation. In **1**, **2·ACN\_1**, and **2·ACN\_3**, only iodine-carbon fragments are shown; the rest of the molecules are omitted to more clearly show the vectors. Shown in the insets are the truncated projections of the structures when the  $\text{P}=\text{O}$  bond is within the plane to illustrate the change in direction of  $\delta_{33}$ .

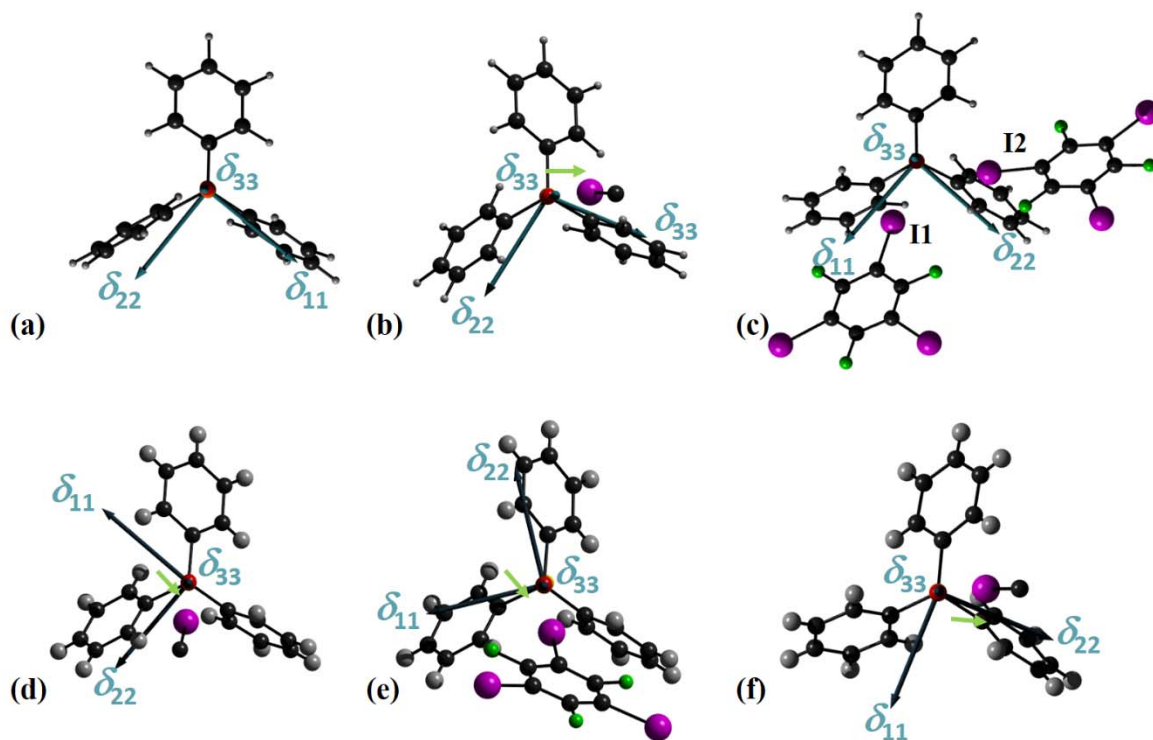

**Figure S5.** Projection of the crystal structures of the starting material  $\text{Ph}_3\text{P}^{17}\text{O}$  (a), and its halogen-bonded cocrystals: **1** (b), **2** (c), and **2·ACN\_1** (d), **2·ACN\_2** (e) and **2·ACN\_3** (f) where the  $\text{P}=\text{O}$  bond is perpendicular to the plane for illustration of the GIPAW DFT-calculated orientations of  $^{31}\text{P}$  the CS tensors (indicated as dark green arrows) in the molecular frame. The light green arrows indicate the direction of  $\delta_{33}$  movement upon halogen bonding. In **1**, **2·ACN\_1**, and **2·ACN\_3**, only iodine-carbon fragments are shown and the rest of the molecules are omitted to more clearly show the vectors.

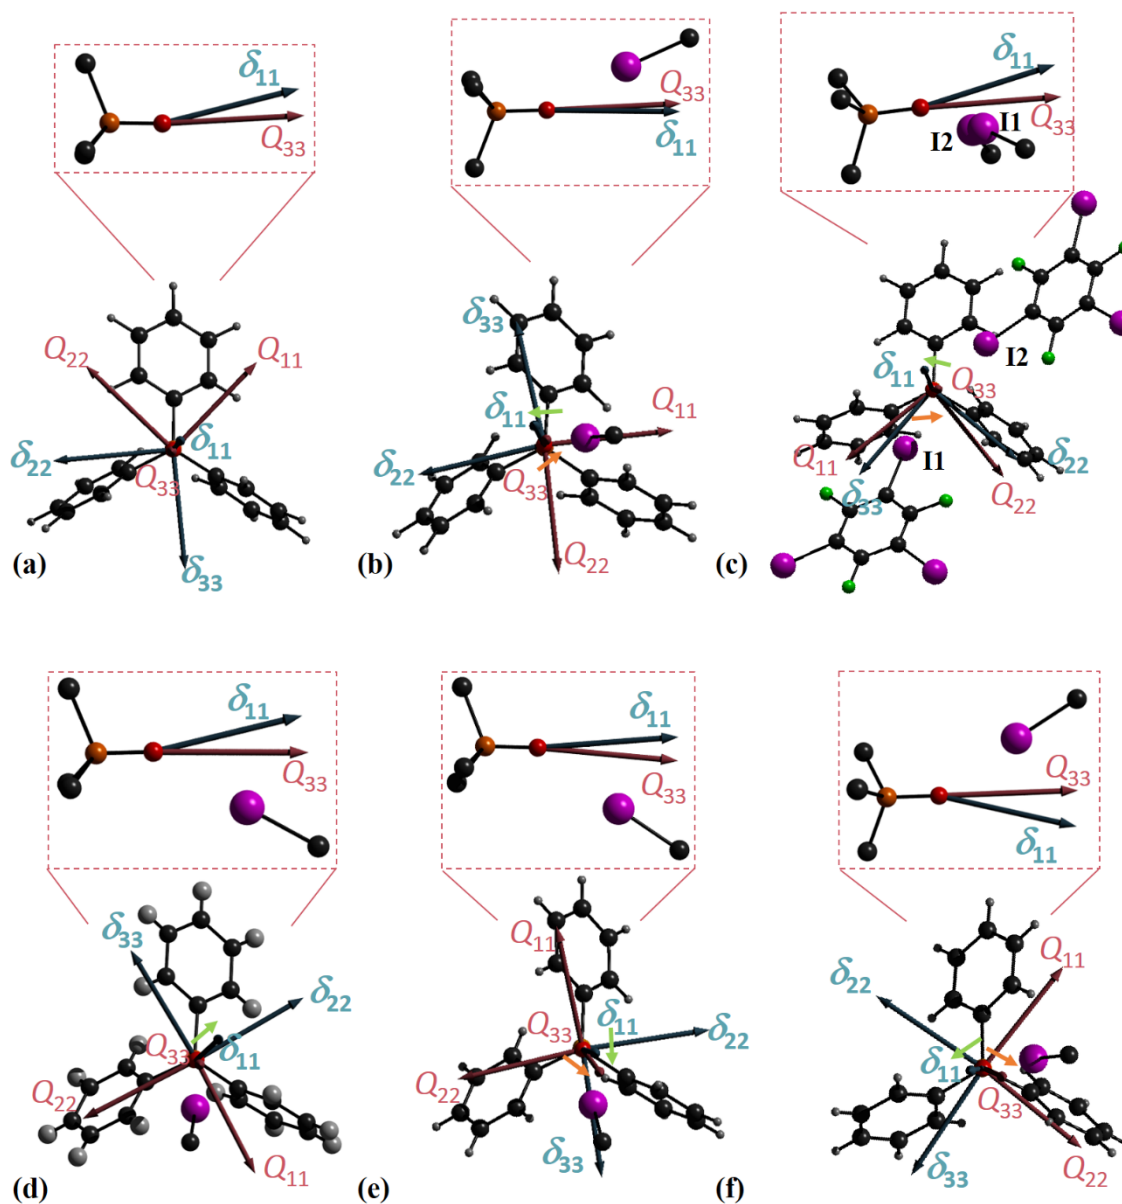

**Figure S6.** Projection of the crystal structure of the starting material  $\text{Ph}_3\text{P}^{17}\text{O}$  (a), and its halogen-bonded cocrystals: **1** (b), **2** (c) and **2·ACN\_1** (d), **2·ACN\_2** (e), and **2·ACN\_3** (f) where the  $\text{P}=\text{O}$  bond is perpendicular to the plane to illustrate the orientation of the principal components of the  $^{17}\text{O}$  CS (dark green arrows) and quadrupolar coupling tensors (pink arrows) in the molecular frame. The light green arrows and orange arrows, respectively, indicate the direction of  $\delta_{11}$  and  $Q_{33}$  movement upon halogen bonding. In **1** and **2·ACN**, only iodine-carbon fragments are shown and

the rest of the molecules are omitted to more clearly show the vectors. Shown in the insets are the simplified projections of the structures when the P=O bond is within the plane to illustrate the change of the direction of  $\delta_{11}$  and  $Q_{33}$ .

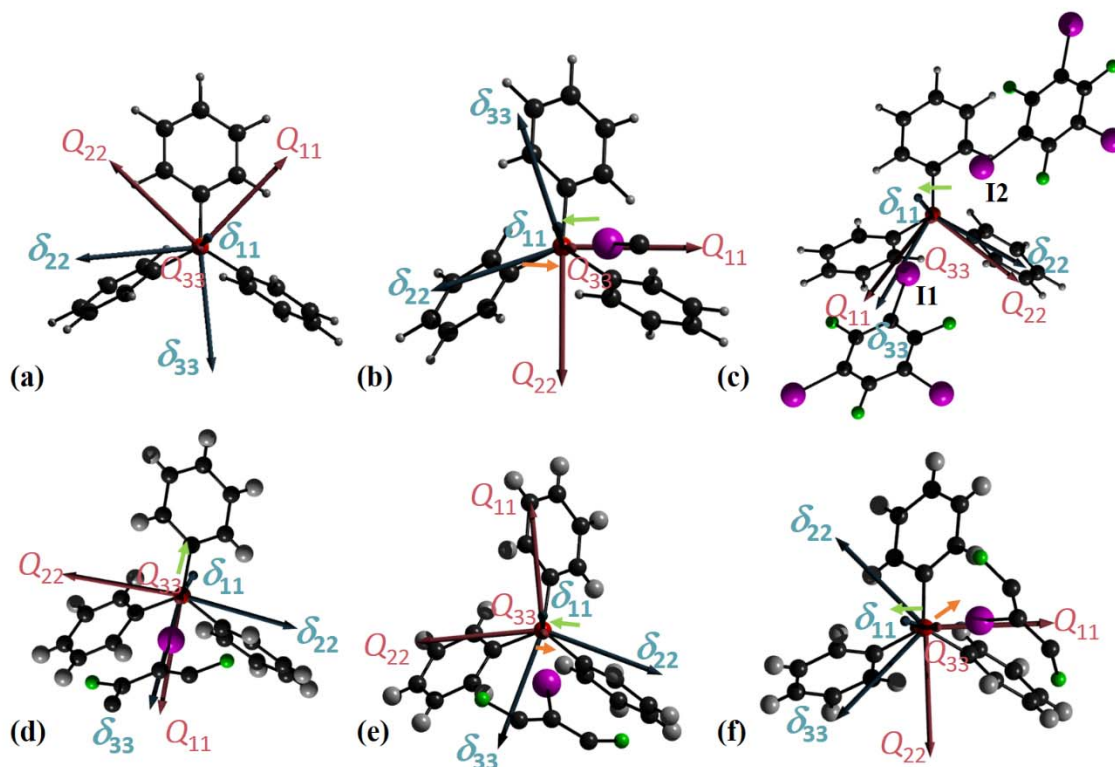

**Figure S7.** Projection of the crystal structure of the starting material  $\text{Ph}_3\text{P}^{17}\text{O}$  (a), and its halogen-bonded cocrystals: **1** (b), **2** (c) and **2·ACN\_1** (d), **2·ACN\_2** (e), and **2·ACN\_3** (f) where the P=O bond is perpendicular to the plane to illustrate the GIPAW DFT-calculated orientation of the principal components of  $^{17}\text{O}$  CS (dark green arrows) and quadrupolar coupling tensors (pink arrows) in the molecular frame. The green arrows and orange arrows, respectively, indicate the



direction of  $\delta_{I1}$  and  $Q_{33}$  movement upon halogen bonding. In **1** and **2**·ACN, only iodine-carbon fragments are shown and the rest of the molecules are omitted to more clearly show the vectors.

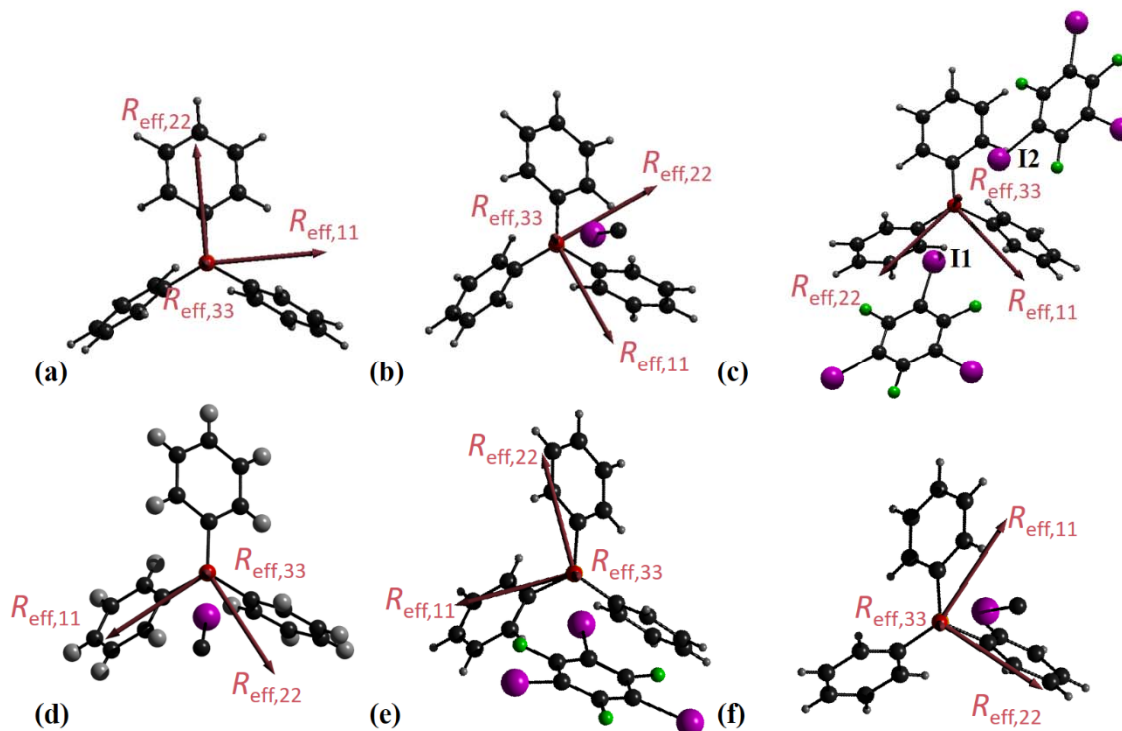

**Figure S8.** Projection of the crystal structures of the starting material  $\text{Ph}_3\text{P}^{17}\text{O}$  (a), and its halogen-bonded cocrystals: **1** (b), **2** (c) and **2·ACN\_1** (d), **2·ACN\_2** (e), and **2·ACN\_3** (f) where the  $\text{P}=\text{O}$  bond is perpendicular to the plane for illustration of the experimental orientations of  $^{31}\text{P}$ - $^{17}\text{O}$  effective dipolar coupling principal components (indicated as pink arrows) in the molecular frame. In **1**, **2·ACN\_1**, and **2·ACN\_3**, only iodine-carbon fragments are shown and the rest of the molecules are omitted to more clearly show the vectors.

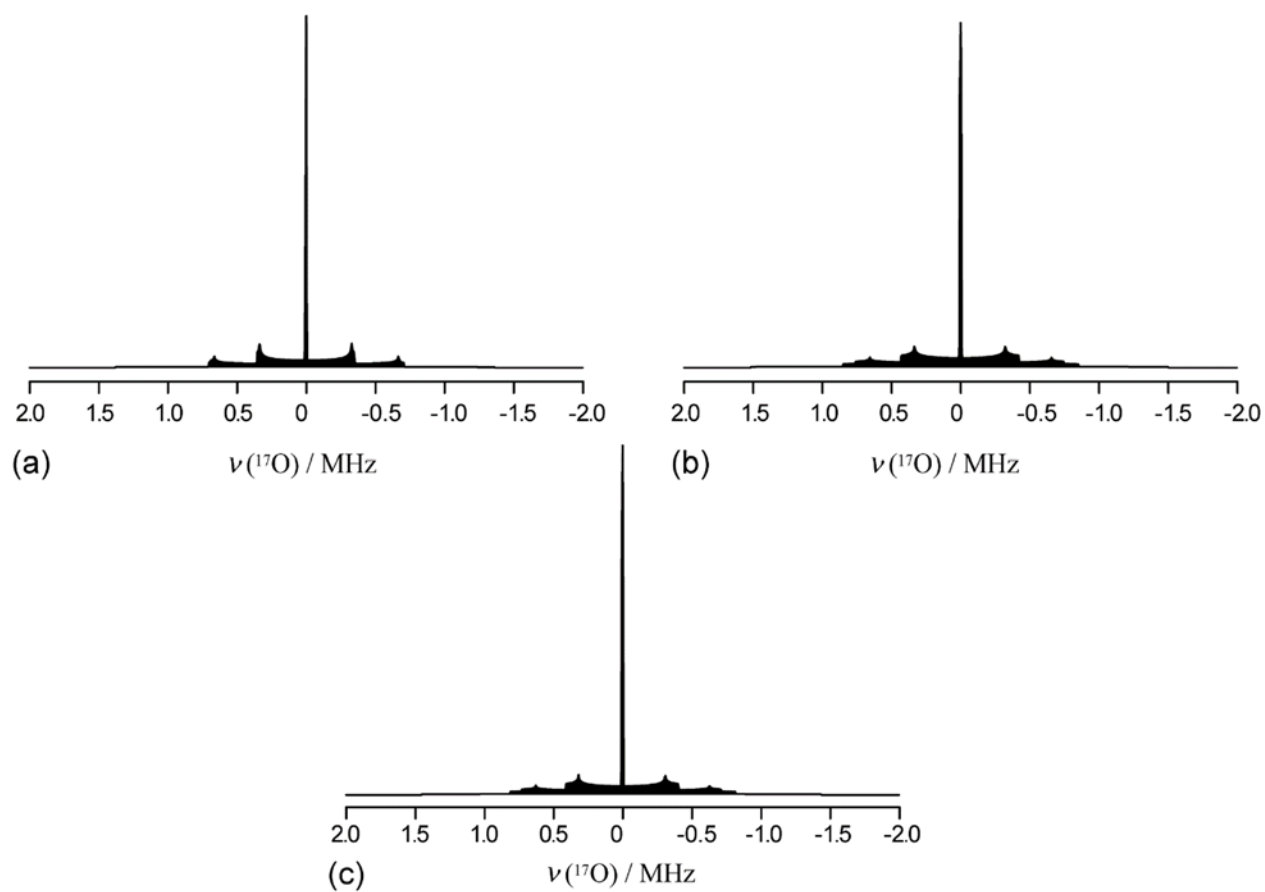

**Figure S9.** Simulated  $^{17}\text{O}$  static powder NMR spectra at 9.4 T for  $\text{Ph}_3\text{PO}$  (a) and its halogen-bonded cocrystals **1**(b) and **2**(c). The relatively low intensities make the measurement of STs by single-crystal NMR very challenging.

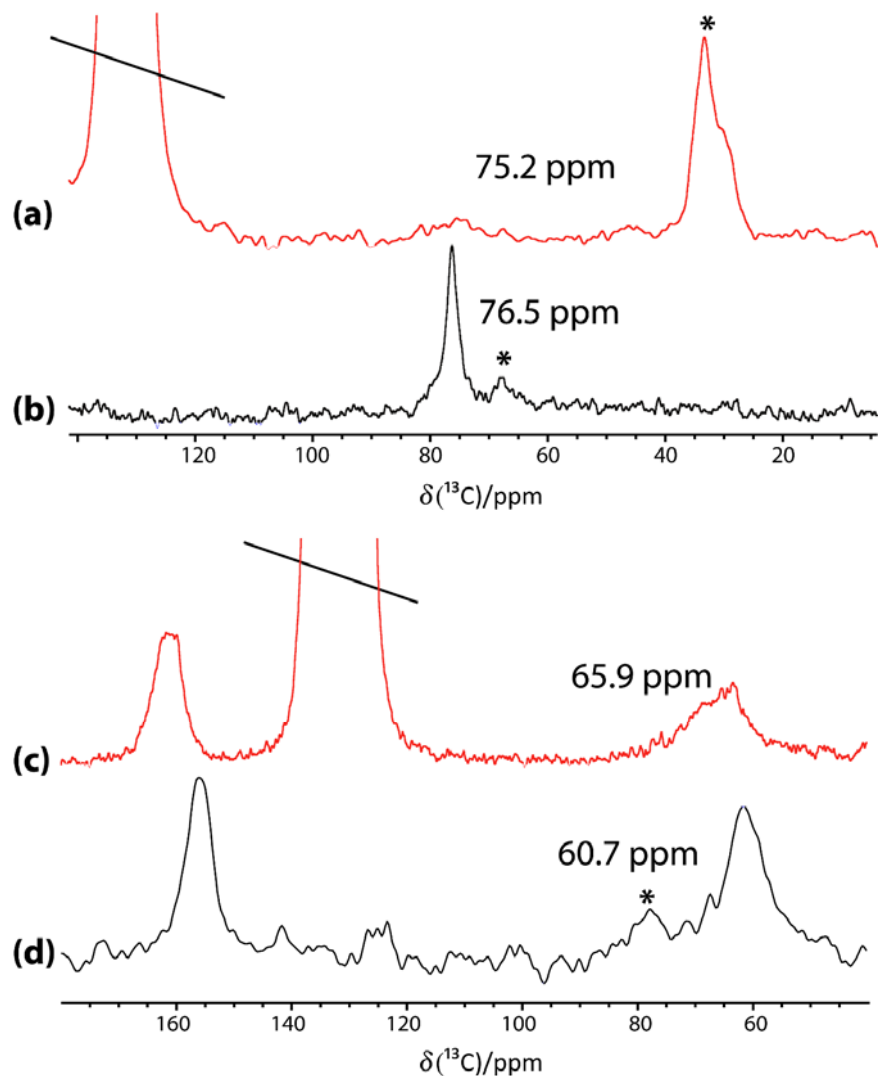

**Figure S10.** Experimental  $^{13}\text{C}$  MAS SSNMR spectra for the region of the carbon covalently bonded to iodine. The spectra corresponding to the starting materials  $p\text{-C}_6\text{F}_4\text{I}_2$ (b) and  $\text{sym-C}_6\text{F}_3\text{I}_3$ (d) are shown in black; the spectra corresponding to the cocrystals **1**(a) and **2**(c) are shown in red. The spectra of cocrystals **1** and **2** were obtained using  $^{13}\text{C}$  cross-polarization (CP) experiments with a MAS rate of 10 kHz whereas the spectrum of  $\text{sym-C}_6\text{F}_3\text{I}_3$ (d) was obtained using a  $^{13}\text{C}$  Hahn-echo (i.e.,  $\pi/2\text{--}\tau_1\text{--}\pi\text{--}\tau_2\text{--acq}$ ) experiment with spinning speed of 8 kHz. The spectrum of  $p\text{-C}_6\text{F}_4\text{I}_2$  (b) was acquired at 21.1 T and was previously shown in reference 1. Other spectra were acquired at 9.4 T. The asterisks indicate spinning sidebands.

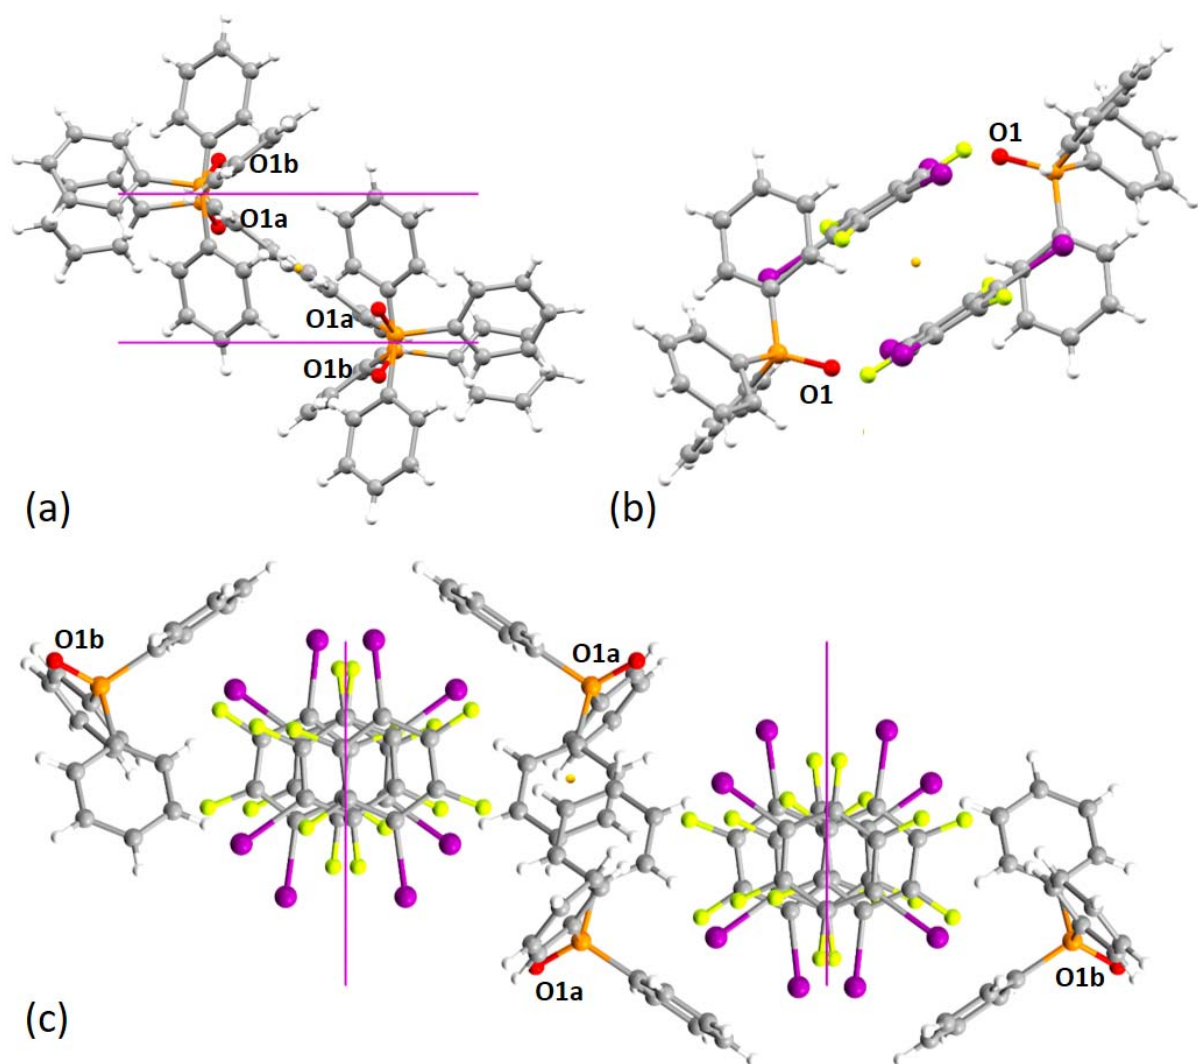

**Figure S11.** Representation of one unit cell of  $\text{Ph}_3\text{PO}$  (a) and its halogen-bonded cocrystal **2**(b) and **1**(c) from single-crystal X-ray diffraction. The small yellow-orange spheres indicate the inversion centers, resulting in two magnetically equivalent oxygen atoms represented by the same label. The pink lines indicate glide planes, generating two magnetically non-equivalent oxygen atoms represented by different letters.

**Table S1.** Single-Crystal X-Ray Data and Selected Data Collection Parameters for **2·ACN** (cif 1907250)

|                                                     | <b>2·ACN</b>                                                       |
|-----------------------------------------------------|--------------------------------------------------------------------|
| Empirical Formula                                   | C <sub>26</sub> H <sub>18</sub> F <sub>3</sub> I <sub>3</sub> NOP  |
| Formula Weight                                      | 829.08                                                             |
| Crystal Size, mm <sup>3</sup>                       | 0.722 × 0.404 × 0.353                                              |
| Crystal System                                      | Triclinic                                                          |
| Space Group                                         | <i>P</i> $\bar{1}$                                                 |
| Z                                                   | 6                                                                  |
| Volume, Å <sup>3</sup>                              | 4229.61(13)                                                        |
| Calculated density, Mg m <sup>-3</sup>              | 1.953                                                              |
| a, Å                                                | 13.6994 (2)                                                        |
| b, Å                                                | 18.2829 (4)                                                        |
| c, Å                                                | 20.3552 (3)                                                        |
| α, deg                                              | 115.9880 (10)                                                      |
| β, deg                                              | 92.9510 (10)                                                       |
| γ, deg                                              | 108.6840 (10)                                                      |
| Absorption coefficient,<br>mm <sup>-1</sup>         | 3.421                                                              |
| <i>F</i> (000)                                      | 2340                                                               |
| θ range for data collection, °                      | 1.845 to 26.500                                                    |
| Limiting indices                                    | -15 ≤ h ≤ 17,<br>-22 ≤ k ≤ 18,<br>-24 ≤ l ≤ 25                     |
| Reflections collected/<br>unique                    | 33791 / 17404                                                      |
| <i>R</i> <sub>int</sub>                             | 0.0298                                                             |
| Completeness to θ = 25.242°, %                      | 99.3                                                               |
| Max and min transmission                            | 0.746 and 0.534                                                    |
| Data/ restraints/ parameters                        | 17404 / 0 / 949                                                    |
| Goodness-of-fit on <i>F</i> <sup>2</sup>            | 0.975                                                              |
| Final <i>R</i> indices [ <i>I</i> > 2σ( <i>I</i> )] | <i>R</i> <sub>1</sub> = 0.0427,<br><i>wR</i> <sub>2</sub> = 0.0904 |
| <i>R</i> indices (all data)                         | <i>R</i> <sub>1</sub> = 0.0983,<br><i>wR</i> <sub>2</sub> = 0.1179 |
| largest diff. peak and hole, e·Å <sup>-3</sup>      | 0.669 and -1.145                                                   |

**Table S2.** Principal Components and Direction Cosines of the  $^{31}\text{P}$  Chemical Shift Tensors in the Crystal Axis Frame<sup>a</sup>

| compound             |               | components / ppm | a*       | b        | c        |
|----------------------|---------------|------------------|----------|----------|----------|
| Ph <sub>3</sub> PO   | $\delta_{11}$ | 96.6(3)          | -0.60(2) | 0.53(1)  | 0.60(2)  |
|                      | $\delta_{22}$ | 83.3(6)          | 0.74(1)  | 0.65(2)  | 0.16(4)  |
|                      | $\delta_{33}$ | -101.3(7)        | 0.31(4)  | -0.54(2) | 0.79(1)  |
| <b>1</b>             | $\delta_{11}$ | 93.9(1)          | 0.06(3)  | -0.48(3) | 0.88(3)  |
|                      | $\delta_{22}$ | 89.1(7)          | 0.90(2)  | -0.35(3) | -0.25(5) |
|                      | $\delta_{33}$ | -92.0(2)         | 0.42(4)  | 0.81(3)  | 0.41(1)  |
| <b>2<sup>b</sup></b> | $\delta_{11}$ | 96.4(3)          | 0.10(3)  | -0.95(3) | 0.31(2)  |
|                      | $\delta_{22}$ | 82.5(7)          | -0.96(2) | -0.01(3) | 0.28(5)  |
|                      | $\delta_{33}$ | -92.0(7)         | 0.26(4)  | 0.32(3)  | 0.91(1)  |
| <b>2·ACN</b>         | $\delta_{11}$ | 92 (1)           | -0.93(2) | 0.37(5)  | 0.07(1)  |
|                      | $\delta_{22}$ | 87(2)            | -0.37(4) | -0.83(2) | -0.43(2) |
|                      | $\delta_{33}$ | -94(6)           | 0.10(2)  | 0.42(3)  | -0.90(1) |
|                      | $\delta_{11}$ | 93(1)            | -0.98(2) | -0.10(1) | -0.17(1) |
|                      | $\delta_{22}$ | 87(2)            | -0.16(2) | 0.92(2)  | 0.37(2)  |
|                      | $\delta_{33}$ | -96(6)           | 0.12(2)  | 0.39(3)  | -0.91(1) |
|                      | $\delta_{11}$ | 92(1)            | -0.92(2) | 0.38(5)  | 0.06(1)  |
|                      | $\delta_{22}$ | 87(2)            | -0.37(4) | -0.83(2) | -0.42(2) |
|                      | $\delta_{33}$ | -98(6)           | 0.11(2)  | 0.41(3)  | -0.90(2) |

<sup>a</sup> The convention used for designating the three principal components of the CS tensor is  $\delta_{11} \geq \delta_{22} \geq \delta_{33}$ .

<sup>b</sup> Compound **2** cannot provide error estimates generated from comparison between two crystallographic equivalent but magnetically distinct sites like Ph<sub>3</sub>PO and **1**. Uncertainties from single-crystal NMR data fitting are only on the order of 0.1 ppm. Therefore, we estimate the error to be similar to the largest error present in analysis of Ph<sub>3</sub>PO and **1**.

**Table S3.** Principal Components and Direction Cosines of the  $^{17}\text{O}$  Chemical Shift Tensors in the Crystal Axis Frame<sup>a</sup>

| compound                  |               | components / ppm | a*       | b        | c         |
|---------------------------|---------------|------------------|----------|----------|-----------|
| Ph <sub>3</sub> PO        | $\delta_{11}$ | 151(8)           | -0.43(2) | 0.41(3)  | -0.81(1)  |
|                           | $\delta_{22}$ | 12(1)            | -0.86(2) | 0.05(5)  | 0.49(3)   |
|                           | $\delta_{33}$ | -8(2)            | 0.24(3)  | 0.91(2)  | 0.33(6)   |
| <b>1</b>                  | $\delta_{11}$ | 109(3)           | -0.50(5) | -0.71(3) | -0.49(1)  |
|                           | $\delta_{22}$ | 19(2)            | 0.63(7)  | 0.08(7)  | -0.78(7)  |
|                           | $\delta_{33}$ | 5(1)             | 0.59(6)  | -0.70(3) | 0.40(12)  |
| <b>2<sup>b</sup></b>      | $\delta_{11}$ | 152(8)           | 0.42(5)  | 0.29(3)  | 0.86(1)   |
|                           | $\delta_{22}$ | 33(2)            | 0.90(7)  | -0.23(7) | -0.37(7)  |
|                           | $\delta_{33}$ | -10(2)           | -0.09(6) | -0.93(3) | 0.36(12)  |
| <b>2·ACN<sup>rb</sup></b> | $\delta_{11}$ | 125(8)           | 0.19(5)  | 0.56(3)  | -0.81(1)  |
|                           | $\delta_{22}$ | 29(2)            | -0.92(7) | 0.38(7)  | 0.05(7)   |
|                           | $\delta_{33}$ | -11(2)           | -0.34(6) | -0.74(3) | -0.58(12) |
|                           | $\delta_{11}$ | 133(8)           | 0.33(5)  | 0.57(3)  | -0.75(1)  |
|                           | $\delta_{22}$ | 41(2)            | -0.89(7) | -0.08(7) | -0.46(7)  |
|                           | $\delta_{33}$ | -30(2)           | 0.32(6)  | -0.82(3) | -0.47(12) |

<sup>a</sup> The convention used for designating the three principal components of the CS tensor is  $\delta_{11} \geq \delta_{22} \geq \delta_{33}$ .

<sup>b</sup> Compounds **2** and **2·ACN** cannot provide error estimates generated from comparison between two crystallographic equivalent but magnetically distinct sites like Ph<sub>3</sub>PO and **1**. Uncertainties from single-crystal NMR data fitting are only on the order of 0.1 ppm for CS tensors. Therefore, we estimate the error to be similar to the largest error present in analysis of Ph<sub>3</sub>PO and **1**.



**Table S4.** Principal Components (in MHz) and Direction Cosines of the  $^{17}\text{O}$  Quadrupolar Coupling Tensors in the Crystal Axis Frame<sup>a</sup>

| compound                 |          | components / MHz | a*       | b        | c        |
|--------------------------|----------|------------------|----------|----------|----------|
| Ph <sub>3</sub> PO       | $Q_{33}$ | -0.228(2)        | 0.32(2)  | -0.50(2) | 0.80(1)  |
|                          | $Q_{22}$ | 0.118(1)         | 0.22(6)  | -0.78(2) | -0.58(1) |
|                          | $Q_{11}$ | 0.110(3)         | -0.92(2) | -0.37(6) | -0.14(2) |
| <b>1</b>                 | $Q_{33}$ | -0.248(1)        | 0.46(3)  | 0.80(1)  | 0.37(1)  |
|                          | $Q_{22}$ | 0.130(2)         | -0.72(1) | 0.58(2)  | -0.37(4) |
|                          | $Q_{11}$ | 0.118(1)         | -0.51(3) | -0.10(1) | 0.85(1)  |
| <b>2<sup>b</sup></b>     | $Q_{33}$ | -0.240(2)        | 0.20(3)  | 0.28(2)  | 0.94(1)  |
|                          | $Q_{22}$ | 0.132(1)         | 0.98(6)  | 0.01(2)  | -0.21(4) |
|                          | $Q_{11}$ | 0.108(3)         | 0.06(3)  | -0.96(6) | 0.27(2)  |
| <b>2·ACN<sup>b</sup></b> | $Q_{33}$ | -0.247(2)        | 0.11(3)  | 0.43(2)  | -0.90(1) |
|                          | $Q_{22}$ | 0.135(1)         | 0.89(6)  | -0.44(2) | -0.10(4) |
|                          | $Q_{11}$ | 0.112(3)         | -0.43(3) | -0.79(6) | -0.43(2) |
|                          | $Q_{33}$ | -0.241(2)        | 0.13(3)  | 0.44(2)  | -0.89(1) |
|                          | $Q_{22}$ | 0.133(1)         | -0.97(6) | -0.13(2) | -0.21(4) |
|                          | $Q_{11}$ | 0.107(3)         | -0.21(3) | 0.89(6)  | 0.40(2)  |

<sup>a</sup> The convention used for designating the three principal components of the quadrupolar coupling tensor is  $|Q_{33}| \geq |Q_{22}| \geq |Q_{11}|$ .

<sup>b</sup> Compounds **2** and **2·ACN** cannot provide error values estimated from comparison between two crystallographic equivalent but magnetically distinct sites like Ph<sub>3</sub>PO and **1**. Uncertainties from single-crystal NMR data fitting are only on the order of 0.001 MHz for EFG tensors. Therefore, we estimate the error to be similar to the largest error present in analysis of Ph<sub>3</sub>PO and **1**.

**Table S5.** Principal Components (in Hz) and Direction Cosines of the Averaged Effective  $^{17}\text{O}$ - $^{31}\text{P}$  Dipolar Coupling Tensors in the Crystal Axis Frame<sup>a</sup>

| compound                 |                     | components / Hz | a*        | b         | c        |
|--------------------------|---------------------|-----------------|-----------|-----------|----------|
| Ph <sub>3</sub> PO       | $R_{\text{eff},33}$ | 3715(42)        | -0.33(3)  | 0.51(2)   | -0.80(1) |
|                          | $R_{\text{eff},22}$ | -1832(32)       | 0.22(11)  | 0.86(2)   | 0.46(4)  |
|                          | $R_{\text{eff},11}$ | -1883(10)       | -0.92(3)  | 0.03(11)  | 0.39(4)  |
| <b>1</b>                 | $R_{\text{eff},33}$ | 3734(20)        | -0.45(3)  | -0.80(3)  | -0.40(2) |
|                          | $R_{\text{eff},22}$ | -1821(10)       | 0.74(2)   | -0.09(5)  | -0.67(3) |
|                          | $R_{\text{eff},11}$ | -1913(30)       | -0.50(5)  | 0.59(3)   | -0.63(2) |
| <b>2<sup>b</sup></b>     | $R_{\text{eff},33}$ | 3795(42)        | 0.26(3)   | 0.32(3)   | 0.91(3)  |
|                          | $R_{\text{eff},22}$ | -1853(32)       | 0.10(11)  | -0.95(5)  | 0.31(4)  |
|                          | $R_{\text{eff},11}$ | -1942(30)       | -0.96(5)  | -0.01(11) | 0.28(4)  |
| <b>2·ACN<sup>b</sup></b> | $R_{\text{eff},33}$ | 3883(42)        | 0.11(3)   | 0.46(3)   | -0.88(3) |
|                          | $R_{\text{eff},22}$ | -1870(32)       | -0.44(11) | -0.77(5)  | -0.46(4) |
|                          | $R_{\text{eff},11}$ | -2014(30)       | 0.89(5)   | -0.44(11) | -0.12(4) |
|                          | $R_{\text{eff},33}$ | 3944(42)        | 0.12(3)   | 0.44(3)   | -0.89(3) |
|                          | $R_{\text{eff},22}$ | -1900(32)       | -0.30(11) | 0.87(5)   | 0.39(4)  |
|                          | $R_{\text{eff},11}$ | -2044(30)       | -0.95(5)  | -0.22(11) | -0.23(4) |

<sup>a</sup> The convention used for designating the three principal components of the effective  $^{31}\text{P}$ - $^{17}\text{O}$  dipolar coupling tensor is  $|R_{\text{eff},33}| \geq |R_{\text{eff},11}| \geq |R_{\text{eff},22}|$ .

<sup>b</sup> Compounds **2** and **2·ACN** cannot provide error values estimated from comparison between two crystallographic equivalent but magnetically distinct sites like Ph<sub>3</sub>PO and **1**. Uncertainties from single-crystal NMR data fitting are only on the order of 10 Hz. Therefore, we estimate the error to be similar to the largest error present in analysis of Ph<sub>3</sub>PO and **1**.

## Reference:

- (1) Viger-Gravel, J.; Leclerc, S.; Korobkov, I.; Bryce, D. L. Correlation Between  $^{13}\text{C}$  Chemical Shifts and the Halogen Bonding Environment in a Series of Solid *para*-Diiodotetrafluorobenzene Complexes. *CrystEngComm* **2013**, *15*, 3168–3177.
